# Supplementary material for: Segmentation Uncertainty Estimation as a Sanity Check for Image Biomarker Studies
Source: Preprints.org preprint supplement (doi:10.20944/preprints202202.0139.v1), 2022-02-09
Supplement: Supplementary file 3 [file supplementary]

SUPPLEMENTARY MATERIAL

Table S1 – radiomic features ranked according to their η values in Lung1 set. The top four and the bottom four features were used in the model setup (highlighted in green).

| feature | η |
| --- | --- |
| original_firstorder_Maximum | 0.0 |
| original_gldm_GrayLevelNonUniformity | 0.0108 |
| original_glrlm_GrayLevelNonUniformity | 0.0115 |
| original_ngtdm_Coarseness | 0.0129 |
| original_glszm_LargeAreaHighGrayLevelEmphasis | 0.0218 |
| original_glszm_ZoneVariance | 0.0277 |
| original_glszm_LargeAreaEmphasis | 0.0278 |
| original_firstorder_90Percentile | 0.0342 |
| original_glszm_LargeAreaLowGrayLevelEmphasis | 0.0356 |
| original_shape_Maximum3DDiameter | 0.0394 |
| original_gldm_DependenceVariance | 0.0415 |
| original_shape_Maximum2DDiameterColumn | 0.0454 |
| original_shape_Maximum2DDiameterRow | 0.0455 |
| original_shape_MeshVolume | 0.0455 |
| original_shape_VoxelVolume | 0.0461 |
| original_shape_Maximum2DDiameterSlice | 0.0472 |
| original_firstorder_Median | 0.0524 |
| original_ngtdm_Busyness | 0.0535 |
| original_glrlm_RunVariance | 0.0544 |
| original_shape_SurfaceArea | 0.057 |
| original_gldm_LargeDependenceHighGrayLevelEmphasis | 0.0628 |
| original_gldm_DependenceNonUniformityNormalized | 0.063 |
| original_gldm_LargeDependenceEmphasis | 0.0658 |
| original_glrlm_LongRunEmphasis | 0.0663 |
| original_glrlm_LongRunHighGrayLevelEmphasis | 0.0717 |
| original_shape_SurfaceVolumeRatio | 0.0719 |
| original_glrlm_RunPercentage | 0.0758 |
| original_glcm_Idmn | 0.0791 |
| original_glcm_Idn | 0.0798 |
| original_glcm_MaximumProbability | 0.0858 |
| original_gldm_DependenceNonUniformity | 0.0879 |
| original_glszm_GrayLevelNonUniformity | 0.0904 |
| original_glcm_Idm | 0.0906 |
| original_ngtdm_Contrast | 0.0911 |
| original_glrlm_RunLengthNonUniformityNormalized | 0.0913 |
| original_glcm_Id | 0.0917 |
| original_glrlm_ShortRunEmphasis | 0.093 |
| original_glcm_JointEnergy | 0.0933 |
| original_glrlm_RunLengthNonUniformity | 0.0957 |
| original_glszm_ZonePercentage | 0.0995 |
| original_gldm_SmallDependenceEmphasis | 0.0996 |
| original_glcm_InverseVariance | 0.1 |
| original_gldm_SmallDependenceLowGrayLevelEmphasis | 0.1063 |
| original_firstorder_Range | 0.1132 |
| original_firstorder_Uniformity | 0.1135 |
| original_glcm_DifferenceAverage | 0.1146 |
| original_gldm_HighGrayLevelEmphasis | 0.1153 |
| original_firstorder_InterquartileRange | 0.1157 |
| original_glcm_Autocorrelation | 0.1178 |
| original_glrlm_HighGrayLevelRunEmphasis | 0.1197 |
| original_ngtdm_Strength | 0.1203 |
| original_glcm_DifferenceEntropy | 0.1237 |
| original_firstorder_Mean | 0.1278 |
| original_glcm_JointEntropy | 0.1313 |
| original_glcm_JointAverage | 0.1324 |
| original_glcm_SumAverage | 0.1324 |
| original_firstorder_Kurtosis | 0.1329 |
| original_glcm_Contrast | 0.1348 |
| original_shape_Sphericity | 0.1411 |
| original_firstorder_RobustMeanAbsoluteDeviation | 0.1433 |
| original_firstorder_Entropy | 0.1452 |
| original_gldm_LowGrayLevelEmphasis | 0.1459 |
| original_glcm_SumEntropy | 0.1479 |
| original_glrlm_GrayLevelNonUniformityNormalized | 0.1488 |
| original_glrlm_ShortRunLowGrayLevelEmphasis | 0.1503 |
| original_glszm_SizeZoneNonUniformityNormalized | 0.1514 |
| original_glrlm_ShortRunHighGrayLevelEmphasis | 0.1524 |
| original_glcm_DifferenceVariance | 0.1526 |
| original_glrlm_LowGrayLevelRunEmphasis | 0.1559 |
| original_firstorder_Minimum | 0.1564 |
| original_glszm_HighGrayLevelZoneEmphasis | 0.1569 |
| original_glszm_SmallAreaHighGrayLevelEmphasis | 0.1577 |
| original_gldm_LargeDependenceLowGrayLevelEmphasis | 0.1585 |
| original_glszm_SmallAreaEmphasis | 0.1593 |
| original_glszm_SizeZoneNonUniformity | 0.1636 |
| original_firstorder_Skewness | 0.1647 |
| original_glcm_Imc1 | 0.1658 |
| original_firstorder_10Percentile | 0.1665 |
| original_gldm_SmallDependenceHighGrayLevelEmphasis | 0.1678 |
| original_firstorder_MeanAbsoluteDeviation | 0.1803 |
| original_firstorder_RootMeanSquared | 0.1829 |
| original_glcm_SumSquares | 0.1908 |
| original_glcm_ClusterTendency | 0.1966 |
| original_gldm_GrayLevelVariance | 0.1982 |
| original_firstorder_Variance | 0.1984 |
| original_ngtdm_Complexity | 0.2172 |
| original_glcm_ClusterProminence | 0.2222 |
| original_glszm_LowGrayLevelZoneEmphasis | 0.2326 |
| original_gldm_DependenceEntropy | 0.2385 |
| original_glcm_ClusterShade | 0.2423 |
| original_glrlm_GrayLevelVariance | 0.249 |
| original_glszm_SmallAreaLowGrayLevelEmphasis | 0.255 |
| original_glrlm_LongRunLowGrayLevelEmphasis | 0.2567 |
| original_firstorder_TotalEnergy | 0.2572 |
| original_firstorder_Energy | 0.2572 |
| original_glszm_ZoneEntropy | 0.2726 |
| original_glcm_Imc2 | 0.2816 |
| original_glcm_Correlation | 0.2874 |
| original_glszm_GrayLevelVariance | 0.2944 |
| original_glrlm_RunEntropy | 0.3066 |
| original_glcm_MCC | 0.3216 |
| original_glszm_GrayLevelNonUniformityNormalized | 0.4005 |
